# Supplementary material
Source: publisher figshare collection journal article supplement (https://karger.figshare.com/ndownloader/files/40850855)
Supplement: Supplementary file 1 [file 40850855]

Supplementary document 1

| qPCR | Sequence |
| --- | --- |
| BBC3-Forward | 5′- GGCATAGAGCCACATGCGA - 3′; |
| BBC3-Reverse | 5′- GGCATAGAGCCACATGCGA - 3′; |
| Bcl2l11-Forward | 5′- ACTTGGATTCACACCACCTCC - 3′; |
| Bcl2l11-Reverse | 5′- GTCGGGATTACCTTGCGGTT - 3′; |
| GAPDH-Forward | 5′-CATCACCATCTTCCAGGAGCG -3′; |
| GAPDH-Reverse | 5′-TGACCTTGCCCACAGCCTTG -3′. |

qPCR Primer

| Primary antibodies | Code | Working Concentration |
| --- | --- | --- |
| anti-Cx43 antibody (CST) | 3512S | 1:1000 |
| anti-Sirt1 antibody (CST) | 2493S | 1:1000 |
| anti- FoxO3a antibody (CST) | 12829S | 1:1000 |
| anti- Bim antibody (CST) | 2933S | 1:1000 |
| anti- Puma antibody (CST) | 98672S | 1:1000 |
| anti- GAPDH antibody (CST) | 5174S | 1:5000 |

Primary antibodies in western blot
